# Supplementary material
Source: HighWire-hosted journal article supplement (doi:10.1101/rna.049221.114)
Supplement: Supp_Data_1.xlsx [file Supp_Data_1.xlsx]

## Sheet: investigation
ONTOLOGY SOURCE REFERENCE
Term Source Name	OBI	CHEBI	UO
Term Source File
Term Source Version	v 1.26	v 1.26	v 1.26
Term Source Description	Ontology for Biomedical Investigations	Chemical Entity of Biological Interest	Unit Ontology
INVESTIGATION
Investigation Identifier
Investigation Title
Investigation Description
Investigation Submission Date
Investigation Public Release Date
INVESTIGATION PUBLICATIONS
Investigation PubMed ID
Investigation Publication DOI
Investigation Publication Author list
Investigation Publication Title
Investigation Publication Status
Investigation Publication Status Term Accession Number
Investigation Publication Status Term Source REF
INVESTIGATION CONTACTS
Investigation Person Last Name
Investigation Person First Name
Investigation Person Mid Initials
Investigation Person Email
Investigation Person Phone
Investigation Person Fax
Investigation Person Address
Investigation Person Affiliation
Investigation Person Roles
Investigation Person Roles Term Accession Number
Investigation Person Roles Term Source REF
STUDY
Study Identifier
Study Title	RB1 SNRNASM
Study Submission Date
Study Public Release Date
Study Description	The WT RB1 5′ UTR sequence with hairpin adapters for SHAPE (GGCCTTCGGGCCAAGCTCAGTTGCCGGGCGGGGGAGGGCGCGTCCGGTTTTTCTCAGGGGACGTTGAAATTATTTTTGTAACGGGAGTCGGGAGAGGACGGGGCGTGCCCCGACGTGCGCGCGCGTCGTCCTCCCCGGCGCTCCTCCACAGCTCGCTGGCTCCCGCCGCGGAAAGGCGTCATGCCGTCGATCCGGTTCGCCGGATCCAAATCGGGCTTCGGTCCGGTTC) was inserted between the SgfI and MluI sites of the pCMV6-AC nontagged precision shuttle vector (Origene). H…
Study File Name
STUDY DESIGN DESCRIPTORS
Study Design Type	SNRNASM
Study Design Type Term Accession Number	OBI
Study Design Type Term Source REF
STUDY PUBLICATIONS
Study PubMed ID
Study Publication DOI
Study Publication Author list	Katrina M Kutchko, Wes Sanders, Amanda Solem, Matthew Halvorsen, Ben Ziehr, Nathaniel Moorman, and Alain Laederach
Study Publication Title
Study Publication Status	In preparation
Study Publication Status Term Accession Number
Study Publication Status Term Source REF	OBI
STUDY FACTORS
Study Factor Name
Study Factor Type
Study Factor Type Term Accession Number
Study Factor Type Term Source REF	CHEBI		CHEBI
STUDY ASSAYS
Study Assay Measurement Type	single nucleotide resolution mapping structure
Study Assay Measurement Type Term Accession Number
Study Assay Measurement Type Term Source REF	OBI
Study Assay Technology Type	capillary electrophoresis
Study Assay Technology Type Term Accession Number
Study Assay Technology Type Term Source REF
Study Assay Technology Platform
Study Assay File Name
STUDY PROTOCOLS
Study Protocol Name	1M7 Structure Mapping
Study Protocol Type
Study Protocol Type Term Accession Number
Study Protocol Type Term Source REF	OBI	OBI	OBI
Study Protocol Description
Study Protocol URI
Study Protocol Version
Study Protocol Parameters Name
Study Protocol Parameters Name Term Accession Number
Study Protocol Parameters Name Term Source REF
Study Protocol Components Name
Study Protocol Components Type
Study Protocol Components Type Term Accession Number
Study Protocol Components Type Term Source REF
STUDY CONTACTS
Study Person Last Name	Laederach	Kutchko	Sanders	Solem
Study Person First Name	Alain	Katrina	Wes	Amanda
Study Person Mid Initials		M
Study Person Email	alain@unc.edu	kutchko@email.unc.edu	wessanders99@gmail.com	amanda.solem@gmail.com
Study Person Phone
Study Person Fax
Study Person Address
Study Person Affiliation	University of North Carolina at Chapel Hill	University of North Carolina at Chapel Hill	University of North Carolina at Chapel Hill	University of North Carolina at Chapel Hill
Study Person Roles	Principal Investigator	Graduate Student	Lab Technician	Postdoctoral Fellow
Study Person Roles Term Accession Number
Study Person Roles Term Source REF	OBI	OBI	OBI

## Sheet: study_assays
Source Name	Characteristics[Nucleotide Sequence]	Characteristics[Nucleotide Type]	Characteristics[RNA Production]	Protocol REF	Parameter Value[Data Starts at Sequence Position]	Parameter Value[software]	Assay Name	Raw Data File	Data Starts At	Performer	Date	Factor Value[probing agent]	Factor Value[folding salt]	Factor Value[folding salt concentration]
WT_Mean	GCUCAGUUGCCGGGCGGGGGAGGGCGCGUCCGGUUUUUCUCAGGGGACGUUGAAAUUAUUUUUGUAACGGGAGUCGGGAGAGGACGGGGCGUGCCCCGACGUGCGCGCGCGUCGUCCUCCCCGGCGCUCCUCCACAGCUCGCUGGCUCCCGCCGCGGAAAGGCGUC	RNA	in vitro synthesis	NMIA RNA structure mapping assay	1					Katrina Kutchko	2014-11-29
WT_SD	GCUCAGUUGCCGGGCGGGGGAGGGCGCGUCCGGUUUUUCUCAGGGGACGUUGAAAUUAUUUUUGUAACGGGAGUCGGGAGAGGACGGGGCGUGCCCCGACGUGCGCGCGCGUCGUCCUCCCCGGCGCUCCUCCACAGCUCGCUGGCUCCCGCCGCGGAAAGGCGUC	RNA	in vitro synthesis	NMIA RNA structure mapping assay	1					Katrina Kutchko	2014-11-29
C4A_Mean	GCUAAGUUGCCGGGCGGGGGAGGGCGCGUCCGGUUUUUCUCAGGGGACGUUGAAAUUAUUUUUGUAACGGGAGUCGGGAGAGGACGGGGCGUGCCCCGACGUGCGCGCGCGUCGUCCUCCCCGGCGCUCCUCCACAGCUCGCUGGCUCCCGCCGCGGAAAGGCGUC	RNA	in vitro synthesis	NMIA RNA structure mapping assay	1					Katrina Kutchko	2014-11-29
C4A_SD	GCUAAGUUGCCGGGCGGGGGAGGGCGCGUCCGGUUUUUCUCAGGGGACGUUGAAAUUAUUUUUGUAACGGGAGUCGGGAGAGGACGGGGCGUGCCCCGACGUGCGCGCGCGUCGUCCUCCCCGGCGCUCCUCCACAGCUCGCUGGCUCCCGCCGCGGAAAGGCGUC	RNA	in vitro synthesis	NMIA RNA structure mapping assay	1					Katrina Kutchko	2014-11-29
C15U_Mean	GCUCAGUUGCCGGGUGGGGGAGGGCGCGUCCGGUUUUUCUCAGGGGACGUUGAAAUUAUUUUUGUAACGGGAGUCGGGAGAGGACGGGGCGUGCCCCGACGUGCGCGCGCGUCGUCCUCCCCGGCGCUCCUCCACAGCUCGCUGGCUCCCGCCGCGGAAAGGCGUC	RNA	in vitro synthesis	NMIA RNA structure mapping assay	1					Katrina Kutchko	2014-11-29
C15U_SD	GCUCAGUUGCCGGGUGGGGGAGGGCGCGUCCGGUUUUUCUCAGGGGACGUUGAAAUUAUUUUUGUAACGGGAGUCGGGAGAGGACGGGGCGUGCCCCGACGUGCGCGCGCGUCGUCCUCCCCGGCGCUCCUCCACAGCUCGCUGGCUCCCGCCGCGGAAAGGCGUC	RNA	in vitro synthesis	NMIA RNA structure mapping assay	1					Katrina Kutchko	2014-11-29
G17C_Mean	GCUCAGUUGCCGGGCGCGGGAGGGCGCGUCCGGUUUUUCUCAGGGGACGUUGAAAUUAUUUUUGUAACGGGAGUCGGGAGAGGACGGGGCGUGCCCCGACGUGCGCGCGCGUCGUCCUCCCCGGCGCUCCUCCACAGCUCGCUGGCUCCCGCCGCGGAAAGGCGUC	RNA	in vitro synthesis	NMIA RNA structure mapping assay	1					Katrina Kutchko	2014-11-29
G17C_SD	GCUCAGUUGCCGGGCGCGGGAGGGCGCGUCCGGUUUUUCUCAGGGGACGUUGAAAUUAUUUUUGUAACGGGAGUCGGGAGAGGACGGGGCGUGCCCCGACGUGCGCGCGCGUCGUCCUCCCCGGCGCUCCUCCACAGCUCGCUGGCUCCCGCCGCGGAAAGGCGUC	RNA	in vitro synthesis	NMIA RNA structure mapping assay	1					Katrina Kutchko	2014-11-29
G18U_Mean	GCUCAGUUGCCGGGCGGUGGAGGGCGCGUCCGGUUUUUCUCAGGGGACGUUGAAAUUAUUUUUGUAACGGGAGUCGGGAGAGGACGGGGCGUGCCCCGACGUGCGCGCGCGUCGUCCUCCCCGGCGCUCCUCCACAGCUCGCUGGCUCCCGCCGCGGAAAGGCGUC	RNA	in vitro synthesis	NMIA RNA structure mapping assay	1					Katrina Kutchko	2014-11-29
G18U_SD	GCUCAGUUGCCGGGCGGUGGAGGGCGCGUCCGGUUUUUCUCAGGGGACGUUGAAAUUAUUUUUGUAACGGGAGUCGGGAGAGGACGGGGCGUGCCCCGACGUGCGCGCGCGUCGUCCUCCCCGGCGCUCCUCCACAGCUCGCUGGCUCCCGCCGCGGAAAGGCGUC	RNA	in vitro synthesis	NMIA RNA structure mapping assay	1					Katrina Kutchko	2014-11-29
C166U_Mean	GCUCAGUUGCCGGGCGGGGGAGGGCGCGUCCGGUUUUUCUCAGGGGACGUUGAAAUUAUUUUUGUAACGGGAGUCGGGAGAGGACGGGGCGUGCCCCGACGUGCGCGCGCGUCGUCCUCCCCGGCGCUCCUCCACAGCUCGCUGGCUCCCGCCGCGGAAAGGCGUU	RNA	in vitro synthesis	NMIA RNA structure mapping assay	1					Katrina Kutchko	2014-11-29
C166U_SD	GCUCAGUUGCCGGGCGGGGGAGGGCGCGUCCGGUUUUUCUCAGGGGACGUUGAAAUUAUUUUUGUAACGGGAGUCGGGAGAGGACGGGGCGUGCCCCGACGUGCGCGCGCGUCGUCCUCCCCGGCGCUCCUCCACAGCUCGCUGGCUCCCGCCGCGGAAAGGCGUU	RNA	in vitro synthesis	NMIA RNA structure mapping assay	1					Katrina Kutchko	2014-11-29
BTaurus_Mean	CGCGGCGCUCGGUUGCCGGGCGAGGGAGGGCCGGCCCGGUUUUUUUCUCAGGGGAACGUUCAAAUUAUUUUUGUAACGGGAGUCGGCCGAGGACGGGGCGUGCCCGAGGUGCGCGCGUCCUCUCCCUUCCCCGGCCCUCCUCCAGCGCCCGCCGGCGCCUGCCCAGCGAGCGCGUC	RNA	in vitro synthesis	NMIA RNA structure mapping assay	1					Katrina Kutchko	2014-11-29
BTaurus_SD	CGCGGCGCUCGGUUGCCGGGCGAGGGAGGGCCGGCCCGGUUUUUUUCUCAGGGGAACGUUCAAAUUAUUUUUGUAACGGGAGUCGGCCGAGGACGGGGCGUGCCCGAGGUGCGCGCGUCCUCUCCCUUCCCCGGCCCUCCUCCAGCGCCCGCCGGCGCCUGCCCAGCGAGCGCGUC	RNA	in vitro synthesis	NMIA RNA structure mapping assay	1					Katrina Kutchko	2014-11-29
TMLatirostris_Mean	GCUCGGUUGCCGGGUGGGGAGGGCUUGUCCGGUUUUUCUCAGGGGACGUUCAAAUUAUUUUUGUAACGGGAGUCGAGAGAGGACGGGGCGUGCCCCGACGUGUGCGCGCGUCCCCCGCCCCCGCCCUCCUCCACAGCUCUCUAGCUCCUACCCUGUAAGGGCGUC	RNA	in vitro synthesis	NMIA RNA structure mapping assay	1					Katrina Kutchko	2014-11-29
TMLatirostris_SD	GCUCGGUUGCCGGGUGGGGAGGGCUUGUCCGGUUUUUCUCAGGGGACGUUCAAAUUAUUUUUGUAACGGGAGUCGAGAGAGGACGGGGCGUGCCCCGACGUGUGCGCGCGUCCCCCGCCCCCGCCCUCCUCCACAGCUCUCUAGCUCCUACCCUGUAAGGGCGUC	RNA	in vitro synthesis	NMIA RNA structure mapping assay	1					Katrina Kutchko	2014-11-29

## Sheet: datamatrix
WT_Mean	WT_SD	C4A_Mean	C4A_SD	C15U_Mean	C15U_SD	G17C_Mean	G17C_SD	G18U_Mean	G18U_SD	C166U_Mean	C166U_SD	BTaurus_Mean	BTaurus_SD	TMLatirostris_Mean	TMLatirostris_SD
0.382666	0.0358247	0.392559	0.0376612	0.10722	0.0198637	0.413447	0.0442907	0.068836	0.042122	0.342055	0.0542442	0.252795	0.012205	0.322992	0.0487044
0.0713327	0.00420659	0.143567	0.0128861	0.0290444	0.00677447	0.128856	0.021414	0.0165701	0.00259055	0.100909	0.0177561	0.176785	0.0118338	0.0565702	0.0154221
0.20122	0.0434902	0.347497	0.0585699	0.183545	0.0296374	0.474446	0.0710597	0.0253202	0.0181173	0.300541	0.0301417	0.0464644	0.00838948	0.130735	0.0314738
-999	0	-999	0	0.182577	0.0241604	0.340606	0.221758	-0.0289119	0.036703	0.233723	0.0687884	0.0292928	0.0036471	0.0941024	0.0122976
0.275229	0.021564	0.319139	0.023591	0.636049	0.038268	0.280562	0.0683291	0.301497	0.153191	0.306572	0.0317044	0.0326301	0.00640599	0.176081	0.0307535
0.357565	0.0596493	0.324264	0.0365204	0.366725	0.0419937	0.235756	0.0581297	0.372543	0.179722	0.337873	0.0126733	0.00473364	0.00357031	0.354875	0.0541928
0.417605	0.0638665	0.427971	0.0557753	0.447741	0.0435339	0.282121	0.0857021	0.509189	0.269123	0.405641	0.0284974	0.0133171	0.00600823	0.321612	0.0400478
0.350558	0.104163	0.417295	0.125181	0.327282	0.049053	0.274454	0.050035	0.468286	0.245953	0.342648	0.030558	0.0521308	0.00573886	0.520346	0.0762959
0.163651	0.0537192	0.196572	0.0502803	0.0763528	0.0386676	0.0652377	0.044402	0.392607	0.0612995	0.20971	0.0133589	0.394868	0.00735598	0.238342	0.0624613
0.0681081	0.00991752	0.0787651	0.0226836	-0.0647399	0.0620539	0.0566308	0.0513337	0.215049	0.0553862	0.080365	0.0124262	0.114565	0.00220368	0.083691	0.0249069
0.0470843	0.0243235	0.0693306	0.00595447	0.0691269	0.0117635	0.0503355	0.0396448	0.164683	0.0184566	0.0716416	0.00645149	0.160258	0.0198586	0.0610249	0.0124632
-0.00240247	0.00322255	0.0098053	0.00524991	0.305091	0.0324766	0.0229405	0.0367795	0.0203534	0.0116663	0.00878553	0.00365701	0.366565	0.015459	0.0717611	0.0278904
-0.00563343	0.00710233	0.0100289	0.0134011	0.4879	0.049125	0.0142892	0.0404887	-0.00355861	0.00599778	0.0098328	0.00860586	0.719303	0.0228782	0.127714	0.0283441
-0.00231907	0.00823873	0.0127686	0.0243163	0.0535448	0.0107448	0.0108378	0.024244	-0.000511974	0.016953	0.0136104	0.0181443	0.762129	0.0548763	0.170311	0.0300958
0.00619163	0.00227309	0.00552027	0.0238963	0.0133722	0.0069523	0.0167941	0.0244572	0.0581978	0.0688826	-0.00370077	0.0139175	0.571399	0.0329921	0.293966	0.0660103
0.0607329	0.00913794	0.0417249	0.0308614	0.0190924	0.00905024	0.0182849	0.0187694	0.115244	0.0189218	0.043498	0.0215823	0.227932	0.017747	0.129874	0.032339
0.375841	0.0643568	0.298282	0.0716616	-0.000551779	0.00626741	0.0402632	0.0263876	0.0426278	0.00920728	0.365131	0.0358179	0.12255	0.0107177	0.0825868	0.0213906
0.442727	0.0760258	-999	0	-0.0265463	0.011247	0.0847424	0.0499112	0.0213663	0.00880798	0.35491	0.0793598	0.016718	0.00675263	0.0212433	0.0171614
0.429254	0.0778863	0.242597	0.0440947	-0.0139486	0.00422268	0.227057	0.031854	0.0192057	0.00934441	0.237056	0.0202118	-0.00781092	0.00301474	0.14734	0.0289687
0.518669	0.105083	0.36978	0.0915427	-0.00892565	0.0045462	1.21199	0.197969	0.0103841	0.00842828	0.439017	0.0772593	0.00416125	0.00454312	0.269198	0.0329085
0.581858	0.0782868	0.530393	0.0867962	0.0137831	0.00530745	1.33499	0.20036	0.0152198	0.0106265	0.562054	0.0846866	0.0354202	0.00915678	0.0645235	0.0341311
0.335118	0.0713935	0.2248	0.0134056	0.0984831	0.0147453	0.719943	0.0859413	-0.0139196	0.0186306	0.242158	0.0236526	0.21124	0.0183822	-999	0
-999	0	-999	0	0.112439	0.0212892	0.606874	0.0535937	0.0187144	0.0084692	-999	0	0.274765	0.0244409	-999	0
-999	0	-999	0	-999	0	1.22113	0.14156	0.0943857	0.0425615	-999	0	0.205445	0.0410291	0.119202	0.0233248
-0.0197666	0.0261309	-0.0524817	0.06607	-999	0	0.111236	0.0721519	0.779973	0.882319	-0.0516328	0.0357098	-0.0396356	0.0131481	0.924679	0.0715328
0.229959	0.0217628	0.287772	0.0192283	0.131665	0.016411	0.0546601	0.0384636	-0.0171588	0.0519969	0.273381	0.0505616	0.0433301	0.00592041	0.885072	0.0938824
-0.0112432	0.0466494	-0.0339968	0.0090894	0.100718	0.0136814	0.0282344	0.0210435	-999	0	-0.041527	0.0116429	0.0487827	0.00868993	0.682113	0.0597831
0.0590919	0.0365084	0.0104095	0.018738	0.0227532	0.0273384	0.0142107	0.0136958	-999	0	0.00824752	0.0209566	0.0432062	0.00352448	0.424853	0.0290689
0.042144	0.0104825	0.0324355	0.0128424	0.0193571	0.013887	0.0213497	0.026174	0.0251412	0.0854941	0.0407616	0.0290536	-0.0317277	0.0103305	0.0829608	0.0272316
-0.00189444	0.0443962	-0.0537175	0.041458	-0.0263704	0.0268886	-999	0	-999	0	-0.0821484	0.0448374	-999	0	0.0696424	0.0290872
-999	0	-999	0	-0.0209084	0.0280558	-999	0	-999	0	-999	0	-0.0168267	0.00443072	0.246157	0.0599329
-999	0	-999	0	0.284524	0.0380283	-999	0	-999	0	-999	0	0.00486992	0.00473308	0.609269	0.0553273
-999	0	-999	0	0.62076	0.0316954	-999	0	-999	0	-999	0	0.0512632	0.00763899	0.733264	0.0998188
0.51384	0.0537171	0.270714	0.130345	0.398425	0.0231688	0.263655	0.0683481	-999	0	0.29176	0.0684213	0.163106	0.0143769	0.25986	0.0489336
0.457475	0.0561269	0.57894	0.0471903	0.127505	0.0179117	0.506302	0.0619637	0.264329	0.0537483	0.54102	0.0933122	-0.0163444	0.00827091	0.927421	0.118212
0.648371	0.0262851	0.591508	0.0554361	0.428517	0.0689869	0.594246	0.0365907	0.37879	0.102982	0.572459	0.0448545	-999	0	1.08044	0.073425
0.534247	0.0840771	0.469545	0.0459551	0.451388	0.0661524	0.435625	0.0686847	0.385133	0.107318	0.455889	0.0835643	-999	0	0.970925	0.0736677
0.404017	0.0476453	0.329867	0.034628	0.463027	0.0608309	0.321295	0.0573757	0.35379	0.144125	0.351578	0.0477907	-999	0	0.360377	0.0451296
0.141045	0.0131308	0.157268	0.0261749	0.155715	0.0183864	0.140555	0.0456631	0.150964	0.0377708	0.1484	0.0197672	-999	0	0.210106	0.0305012
0.184576	0.019502	0.204402	0.0171213	0.199925	0.0164759	0.21999	0.0483586	0.21226	0.0315569	0.20788	0.0403365	-999	0	0.0770509	0.0206278
0.0570027	0.0327601	0.176645	0.0686769	0.127694	0.0296132	0.258266	0.0476282	0.179633	0.0677872	0.255522	0.0480438	0.733356	0.0425558	0.194623	0.0313213
0.747091	0.0760104	0.538498	0.0686072	0.676879	0.0536415	0.513485	0.0413812	0.519291	0.188189	0.50046	0.0605011	0.587252	0.0619006	0.329153	0.0323271
0.707844	0.050241	0.538956	0.0516647	1.8009	0.127252	0.202045	0.0131179	1.06139	0.383999	0.548765	0.0358639	0.148441	0.0183752	-999	0
0.266218	0.019832	0.285232	0.0290926	-999	0	0.0986797	0.0449709	0.495448	0.0648897	0.280787	0.0200724	0.572243	0.0181256	-999	0
0.142154	0.0214778	-0.0278512	0.0286333	-999	0	0.0848396	0.0400612	0.179816	0.0444252	0.0446931	0.0297253	0.68907	0.0337576	-999	0
0.490221	0.32125	-999	0	-999	0	0.197434	0.137302	0.381075	0.155571	-999	0	0.665937	0.0509501	1.0978	0.024987
0.461999	0.0131584	0.481545	0.0699871	0.0260605	0.0355917	0.431997	0.0505858	0.182104	0.0900088	0.447329	0.0502756	0.296464	0.00925718	0.264023	0.0189401
0.135471	0.0218204	0.108664	0.0345587	-0.00353132	0.00947632	0.0937651	0.0133848	0.0546207	0.0445083	0.110284	0.0277907	0.470788	0.0186073	0.124789	0.0310066
0.208944	0.0434297	0.140991	0.0199482	0.00321732	0.014869	0.162267	0.0151669	0.152922	0.0743898	0.159331	0.00924067	0.369211	0.033615	0.0947318	0.0168228
0.246771	0.00892643	0.230633	0.0260856	0.183929	0.00384416	0.167647	0.0180442	0.215311	0.092125	0.238556	0.00704776	0.828786	0.0592667	0.0746958	0.0103108
0.518171	0.0375219	0.482301	0.0293787	0.96689	0.0728699	0.265744	0.00928724	0.569128	0.16903	0.469964	0.0350977	0.345113	0.0330643	0.0370864	0.014894
0.687931	0.0497102	0.719355	0.0410937	0.819126	0.0549291	0.525542	0.0437033	0.572024	0.13858	0.707825	0.0751264	0.0854354	0.0162048	0.115199	0.00968862
0.678637	0.0226866	0.701625	0.0949769	0.609742	0.0367291	0.550932	0.0481732	0.536369	0.151813	0.652412	0.0801931	0.0550778	0.0200614	0.116682	0.0110474
0.509868	0.0212638	0.503843	0.0372728	0.497153	0.0143972	0.393512	0.0270852	0.406275	0.140236	0.485556	0.0286039	0.459618	0.0265884	0.253249	0.0225685
0.531397	0.0207587	0.525007	0.0359209	0.500154	0.0225281	0.440075	0.0340707	0.403344	0.128426	0.524468	0.0190129	0.79694	0.0700323	0.640875	0.030729
0.647895	0.035582	0.630447	0.0173022	0.524896	0.0220099	0.575212	0.0416655	0.446842	0.143691	0.626084	0.0405295	0.450126	0.00996306	1.18314	0.0550886
0.993253	0.0819229	0.825154	0.04181	0.689213	0.0176449	0.919486	0.092418	0.641301	0.222264	0.872662	0.0664634	0.0892188	0.0148209	1.95902	0.151456
1.17632	0.0474764	1.09134	0.02471	0.795542	0.0294658	1.02991	0.0608998	0.717296	0.230772	1.10635	0.0622113	0.0838515	0.00953977	1.31924	0.110104
0.867853	0.0345941	0.89046	0.0556668	0.742397	0.0690523	0.770085	0.154776	0.53477	0.174309	0.843165	0.0486596	0.0502511	0.00366848	0.609174	0.0602904
0.405242	0.024696	0.707444	0.0430162	0.416385	0.111712	0.498764	0.0950849	0.439142	0.1709	0.657556	0.0464452	0.0136317	0.00985432	0.357725	0.0393166
0.609012	0.0115688	0.640041	0.0151558	0.607126	0.0422019	0.538266	0.0695338	0.509151	0.0871344	0.613132	0.0318194	0.0293463	0.0056391	0.191089	0.0208521
0.6769	0.0267872	0.670944	0.0124103	0.713415	0.0442687	0.599943	0.0528367	0.539277	0.155208	0.648129	0.0273643	0.100892	0.00618556	0.175137	0.0250345
1.06796	0.103546	0.839667	0.0483404	0.963808	0.0662046	0.780869	0.0644961	0.67753	0.298332	0.850129	0.0492962	0.114666	0.00663154	0.188985	0.0223902
0.937433	0.0160592	1.13498	0.0453263	0.746507	0.0663043	0.951014	0.0857069	0.723262	0.104274	1.0534	0.0640456	0.238877	0.0103567	1.50093	0.0956937
0.878591	0.0361784	0.863274	0.0308234	0.677727	0.0320815	0.84852	0.143818	0.623708	0.157692	0.85409	0.0327452	0.680282	0.0390879	0.217498	0.0277672
0.46028	0.0115463	0.460843	0.0181341	0.780551	0.0513449	0.337395	0.051169	0.493088	0.137874	0.446417	0.0159542	1.2398	0.0547401	0.107596	0.0121574
0.350825	0.00610603	0.34064	0.00711963	0.574704	0.0282244	0.226924	0.0186995	0.376157	0.0987818	0.349891	0.00678632	1.66537	0.115466	0.082769	0.0117712
0.20898	0.00816313	0.197183	0.0228232	0.412048	0.0238166	0.13183	0.00850374	0.233455	0.0552027	0.222104	0.0188015	1.24745	0.0736335	0.132236	0.00396428
0.341975	0.0297992	0.350205	0.030528	0.64128	0.0720944	0.121407	0.00656255	0.42663	0.0676505	0.378069	0.0236269	0.803146	0.0472986	0.0510688	0.00711262
0.461466	0.0429096	0.442585	0.0393058	0.732105	0.0433776	0.268376	0.0398041	0.491281	0.0878281	0.452259	0.0322496	0.370039	0.0188829	0.135176	0.0123732
0.701178	0.0251628	0.639145	0.0221674	0.918855	0.0780235	0.466777	0.0487733	0.853769	0.146799	0.681501	0.076958	0.208862	0.00902944	0.150944	0.0178294
0.496409	0.0159601	0.473772	0.0108537	0.826915	0.0575534	0.444846	0.0547506	0.539257	0.121025	0.508846	0.0289041	0.206924	0.0131214	0.136643	0.0109427
0.139585	0.00357276	0.108224	0.00810651	0.108132	0.0124815	0.0457702	0.0241552	0.266328	0.106044	0.123173	0.00990797	0.161313	0.0128424	0.408578	0.0172477
0.0744061	0.00187508	0.0558677	0.00761892	0.0569709	0.0110257	0.0294181	0.0230131	0.141154	0.0508253	0.0633989	0.00302465	1.39645	0.0512574	0.274943	0.028027
0.0146011	0.0160477	0.0208786	0.0305865	0.00860842	0.0122887	0.0653098	0.0700379	0.024914	0.0104958	0.0331325	0.0317981	0.19444	0.0172871	0.602037	0.0221718
0.00569111	0.00353386	0.0284133	0.0130473	0.0118551	0.0117953	0.0781579	0.11699	0.019367	0.00851022	0.0233374	0.0087442	0.121903	0.00318011	0.144965	0.00328972
0.0165614	0.0084975	0.0137862	0.00516707	0.034774	0.0479	0.0194003	0.0125004	0.0237356	0.0070537	0.011439	0.00625835	0.0426353	0.00949034	0.0772612	0.00651926
0.163355	0.00771251	0.149257	0.0218993	0.0842449	0.0340022	0.130541	0.0428075	0.073157	0.0291871	0.136577	0.0409967	0.199486	0.0186307	0.348502	0.0303129
0.733204	0.0736675	1.08831	0.0621308	0.459436	0.0658289	0.758725	0.246095	0.78713	0.170723	1.00772	0.0563017	0.170842	0.0153413	0.085572	0.0163258
0.0625455	0.0196448	0.0853368	0.0162385	0.0439442	0.0100087	0.095904	0.0552937	0.0756395	0.0196275	0.064756	0.011509	0.680371	0.0136178	0.163781	0.0131119
0.0108157	0.00254487	0.0259631	0.00685702	0.0127168	0.00847002	0.051514	0.0737671	0.0157203	0.00578573	0.0295376	0.00903295	0.549592	0.0466279	0.067349	0.00910412
0.00441093	0.00504869	0.0015033	0.00281182	0.0105325	0.00717495	0.232285	0.288173	0.00856433	0.00701134	0.0103914	0.00868562	0.528629	0.0152491	0.256835	0.0225979
0.00576165	0.00582776	-0.00797264	0.00640879	0.027385	0.0130554	0.0342424	0.0240943	0.0116551	0.0114466	0.000740075	0.0122525	0.565186	0.0328632	0.037837	0.0201797
-0.00329182	0.00160923	0.0114444	0.0165585	0.00964356	0.0122681	0.0334328	0.0508318	0.00158859	0.00284871	0.0238301	0.0147975	0.271025	0.0195004	0.496461	0.0371393
0.00223587	0.00663774	0.0179341	0.0679869	0.0118251	0.00738735	0.0111076	0.0102259	0.0228569	0.0171956	0.0449846	0.0522213	0.215816	0.0171336	0.0926535	0.0538264
0.0105798	0.00278219	0.0144623	0.0375785	0.00727179	0.0243047	0.0144915	0.0140424	0.0148097	0.0110714	0.00210265	0.0182402	0.25118	0.010876	0.0191421	0.00957805
0.0264847	0.00265089	0.0299974	0.0684166	0.0289818	0.0147821	0.0280075	0.0130523	0.0249355	0.00554702	0.0282533	0.0264209	0.174542	0.00607975	0.0194867	0.00561182
0.353328	0.0172055	0.221013	0.0632284	0.319682	0.0271187	0.274127	0.165819	0.470588	0.153809	-999	0	0.163337	0.010941	0.00171113	0.00336522
0.0428041	0.0378271	0.00873556	0.0257006	0.00119082	0.0151949	0.023204	0.0204776	0.0831762	0.0729349	-0.0279022	0.028128	0.0458432	0.0039602	0.0529521	0.00768082
0.00680616	0.00686091	0.00443474	0.00987206	0.0175922	0.017211	0.0136568	0.00224585	0.0409955	0.0339592	0.000941933	0.00459946	0.0362392	0.0040856	0.124574	0.0126921
0.00912056	0.00495237	0.00726575	0.00489029	0.0141707	0.0108064	0.0166702	0.0138477	0.0240345	0.0200398	0.0121672	0.00943967	0.00552271	0.00191309	0.296915	0.00513995
0.00629437	0.00757982	0.00307721	0.00625533	0.00911983	0.00746654	0.0165787	0.0311476	0.00850293	0.00409259	0.00820527	0.00554566	0.00471007	0.00480717	0.095812	0.007965
0.00791577	0.00223127	0.092567	0.0267403	0.0115603	0.0158312	0.140532	0.277125	0.0110112	0.00813965	0.0901703	0.0202122	0.0105384	0.00433783	0.083401	0.00354864
0.0394064	0.00588909	0.0291893	0.00412715	0.0477202	0.0398814	0.0441175	0.0277287	0.105916	0.0723292	0.0247144	0.00795146	0.0251478	0.00479217	0.156606	0.0556548
0.105192	0.0529603	0.0624412	0.0117413	0.192516	0.222614	0.055795	0.0274761	1.21017	1.10654	0.00970265	0.00425047	0.116369	0.00460401	0.100843	0.0197623
0.141626	0.0212139	0.103317	0.0125019	0.0883679	0.0239277	0.104039	0.034321	0.161402	0.0448617	0.0905668	0.0127791	0.564894	0.038952	0.117672	0.036296
0.22558	0.0429173	0.210487	0.0316746	0.204411	0.0318799	0.178345	0.023862	0.245835	0.0694388	0.181604	0.0234596	1.39296	0.0914207	0.540296	0.0403895
1.74115	0.0594119	1.41819	0.0560783	1.44451	0.0639787	1.15381	0.0289199	1.33616	0.285969	1.33919	0.0498755	0.0744869	0.0391096	0.811809	0.077579
1.6333	0.0527157	1.25319	0.0446962	1.33493	0.0507776	1.22399	0.0606568	1.19444	0.363186	1.28959	0.0562737	0.0315422	0.00657081	0.290681	0.0354044
0.605249	0.0141475	0.475571	0.011084	0.483846	0.0131093	0.421994	0.0407505	0.428249	0.160525	0.459071	0.0158477	0.0149009	0.00240187	0.552937	0.0392871
0.470526	0.0237535	0.36408	0.0089831	0.365964	0.0228584	0.432986	0.0420392	0.31999	0.140982	0.345632	0.0139733	0.0125719	0.00230237	0.499406	0.0576586
1.23894	0.0900541	1.07008	0.0308159	0.773413	0.399115	0.96849	0.0701753	1.0156	0.18363	1.0119	0.0341396	0.0114514	0.00178444	0.528003	0.0293216
0.240124	0.0312516	0.1725	0.0455369	0.331267	0.342138	0.258846	0.062938	0.14743	0.0464227	0.209043	0.014883	0.00564208	0.00247148	0.54331	0.0379663
0.143734	0.0260282	0.133324	0.112361	0.0674301	0.0747154	0.0994753	0.040629	0.0866865	0.0204416	0.173931	0.102416	0.0936576	0.00604952	0.685429	0.0439634
0.0425685	0.00934869	0.0496741	0.04251	0.0351107	0.0566883	0.0422653	0.0435286	0.0147681	0.0136868	0.0432842	0.0509733	0.662859	0.0510264	0.24176	0.105742
0.0101312	0.00733455	0.00148856	0.00143722	0.00239602	0.00528547	0.0207401	0.0195871	0.00465924	0.011007	0.00514813	0.00486768	1.9842	0.0708404	0.421303	0.153965
0.00923699	0.00704076	0.0478672	0.119782	0.0037428	0.0157231	0.0272861	0.0198387	0.00985936	0.0219203	0.000136337	0.00314037	1.86551	0.0775332	0.0920509	0.0246883
0.0521589	0.0717394	0.0455767	0.0341481	0.0166951	0.0866973	0.090521	0.0531229	0.515368	0.441017	0.0376666	0.0352849	0.7155	0.0892391	-0.00170831	0.00776631
0.0315229	0.0184769	0.034993	0.00829794	0.0749873	0.0341103	0.0653262	0.0252274	0.0376751	0.0118658	0.0403879	0.0115073	0.247925	0.0181057	0.112634	0.017069
0.180526	0.031751	0.119546	0.0493984	0.170596	0.0926247	0.19913	0.0871502	0.172389	0.0819031	0.209062	0.124239	0.125728	0.00973745	0.20647	0.0187552
3.35271	0.599274	4.59383	0.359425	5.25105	0.163395	4.50266	0.364908	4.42452	0.773578	4.34878	0.304022	0.0145886	0.01142	0.209558	0.0247996
0.24408	0.0176355	0.215646	0.0195195	0.232913	0.0354109	0.231184	0.00706581	0.198098	0.0878227	0.225115	0.00833843	-0.011159	0.0039565	0.0636203	0.00816773
0.0570064	0.0469368	0.0488901	0.0151908	0.0173895	0.0159805	0.0573939	0.00718722	0.0274487	0.0659434	0.0596935	0.0119362	-0.0182729	0.0114292	0.0440789	0.0172373
0.0106239	0.0844562	0.0514839	0.0618709	-0.0356885	0.0219062	0.0588785	0.0394497	0.252269	0.13845	0.0765797	0.0505126	-999	0	0.074248	0.0265418
-999	0	-0.00366596	0.0376771	-999	0	0.016293	0.0737195	-999	0	0.0275391	0.0268618	-999	0	0.0950761	0.0330632
-999	0	-999	0	-999	0	-999	0	-999	0	0.116757	0.107649	-999	0	0.0945079	0.0379502
0.0346041	0.0302473	0.0074746	0.0277949	-0.0530329	0.0346438	0.0116703	0.0299166	-999	0	0.0216957	0.0198643	-999	0	0.0534926	0.0108968
0.000829519	0.00743993	0.0039924	0.00840124	-0.000413287	0.00456842	0.000711162	0.0161737	-0.0534907	0.016714	0.00916715	0.00356364	-0.0318348	0.00274191	0.0406364	0.0135302
0.000323147	0.00662203	-0.000516811	0.0104633	-0.0036922	0.00865778	0.0136169	0.0168658	0.0212519	0.01077	0.00681294	0.0119849	0.00890484	0.00341905	0.0697974	0.0376855
0.0111988	0.00213459	0.00506574	0.0145145	6.61e-05	0.0105279	0.0178615	0.0258365	0.0125954	0.00574063	0.0138173	0.0149326	0.00445606	0.00488154	0.0703112	0.0158876
0.00521728	0.00357796	0.018157	0.0296423	-0.00539948	0.0334905	0.0198084	0.0252737	0.0411499	0.0339938	0.0187974	0.0242228	0.189226	0.088492	0.0773315	0.0152783
0.129873	0.143927	0.244526	0.0607692	0.157243	0.0540029	0.0428375	0.131743	1.5655	1.27806	0.131797	0.0727585	0.0432222	0.00501121	0.166154	0.0153199
0.0874814	0.0499426	0.090336	0.0263036	0.0457208	0.016118	0.100331	0.0837117	0.207057	0.0563606	0.0850842	0.0188632	0.163872	0.00347111	0.114321	0.0214457
0.105379	0.0129134	0.119545	0.020617	0.0456348	0.00688766	0.095066	0.0146243	0.153228	0.153476	0.0888843	0.0188677	0.0330855	0.00758673	0.021058	0.00584271
0.146272	0.0197646	0.102191	0.0407868	0.06693	0.0151077	0.0968207	0.0125395	0.26556	0.136386	0.0747637	0.0158599	0.00738013	0.0115397	0.0231944	0.00458902
0.327642	0.0220512	0.31494	0.03697	0.353584	0.0386387	0.317541	0.0174123	0.111087	0.028429	0.271766	0.0315823	0.0434857	0.00600174	0.0582581	0.00931888
0.648104	0.0227263	0.484956	0.0473869	0.0619341	0.0174089	0.732417	0.116236	0.218463	0.101117	0.453849	0.0305863	0.291865	0.002356	0.0784646	0.00922066
0.520937	0.042798	0.576124	0.0373121	0.0526594	0.0174832	0.285833	0.0234524	0.701264	0.102314	0.577788	0.0449782	0.246838	0.0110547	0.0652168	0.00816116
0.0786003	0.00601837	0.0684295	0.0119268	-0.012867	0.0355033	0.0502277	0.0102262	0.122523	0.0189753	0.074417	0.00791246	0.0651343	0.00592309	0.178524	0.0210075
0.102335	0.010286	0.0592989	0.0150055	0.0108106	0.0388765	0.078445	0.0232888	0.154515	0.0882613	0.0632086	0.00768655	0.010405	0.0165706	0.33969	0.0250892
0.294758	0.00751645	0.235092	0.0121579	0.0277899	0.0132084	0.321323	0.0245706	0.1109	0.0778525	0.215063	0.0186087	0.0231658	0.00407951	0.211993	0.0111242
0.0982715	0.00608304	0.0700441	0.00521861	0.0291596	0.00418772	0.0972732	0.0115107	0.0255581	0.0178476	0.0653338	0.00830859	0.0215007	0.0229267	0.377522	0.026302
0.00516748	0.0200136	0.0632493	0.100953	0.0242504	0.0125248	0.159431	0.149712	0.0169821	0.0073367	0.165683	0.0639154	0.0490496	0.0118123	0.921189	0.0290287
0.179428	0.0197017	0.215477	0.0207989	0.0478469	0.00692615	0.233574	0.0635009	0.0374417	0.0171289	0.215843	0.0102241	0.0510348	0.0275405	0.49463	0.0401578
-0.0598834	0.0751486	0.156446	0.24793	0.130521	0.0678473	0.224482	0.182109	0.106766	0.0245292	0.349195	0.157646	0.0371246	0.0130885	1.02446	0.0429419
0.000981988	0.00842363	0.164176	0.00900348	0.0261205	0.0151758	0.145741	0.0796387	0.0771476	0.0460256	0.17867	0.00766441	0.0416351	0.032805	0.581109	0.0660954
0.191695	0.00879435	0.0417381	0.0106732	0.256766	0.0302378	0.0590766	0.0676822	0.0635031	0.0801743	0.0549241	0.00986116	0.114232	0.0297159	0.0552644	0.00678186
0.0827705	0.00399508	0.122453	0.15733	0.0448017	0.0296654	0.0419783	0.0353177	0.0519647	0.0144178	0.185455	0.11041	0.0481799	0.00626474	0.0762717	0.0206014
0.0412691	0.00932539	0.0171448	0.0111697	-0.0129519	0.0814456	0.0410336	0.0310853	0.0217023	0.0177227	0.0164272	0.00150303	0.0722898	0.00412725	0.102221	0.0512193
0.0177929	0.00145288	0.00574821	0.00605229	0.018465	0.0138719	0.0573813	0.0532634	0.0251276	0.00975027	0.0138398	0.00900132	0.0188913	0.00664586	0.0495282	0.00848319
0.00781529	0.00320129	0.0371507	0.021481	0.00396545	0.0157169	0.0613787	0.0691938	0.465147	0.443721	0.00753372	0.00934907	0.0904955	0.0165686	0.0707311	0.00837489
0.0469683	0.0111794	0.0295538	0.0151927	0.0430836	0.0119957	0.0506031	0.0842379	0.0188994	0.042726	0.0382081	0.00511356			0.372368	0.02602
0.0178918	0.00688176	0.0641148	0.0489941	0.012785	0.0215422	0.0852536	0.121917	-0.0018297	0.0773687	0.0231723	0.0204627			0.599704	0.0538446
0.0714129	0.0217338	0.0558192	0.00821063	-0.0333918	0.0642344	0.0972115	0.0745711	0.000835849	0.052168	0.0813134	0.0581096			0.277395	0.0414223
0.101146	0.0393536	0.0768561	0.0295729	0.113724	0.136219	0.0595076	0.09421	0.151022	0.0165308	0.0542761	0.00610105			0.112357	0.0172532
0.109314	0.0504211	0.0387677	0.0619741	0.221847	0.19389	0.130044	0.30622	0.0628428	0.0578485	0.0657262	0.00845317			0.220574	0.0162477
0.0302047	0.029078	0.0146875	0.0213562	0.108256	0.119357	0.0530209	0.160287	0.0312402	0.0297565	0.00276443	0.0109724			0.027741	0.00735866
0.00716042	0.00467986	0.0119105	0.00261565	0.00581375	0.013782	0.0899081	0.0554187	1.37338	1.15862	0.0126088	0.00624159			0.132647	0.0139256
0.158803	0.0883069	0.138518	0.0684194	-999	0	0.11599	0.137797	0.299759	0.0389222	0.0471059	0.0276076			0.745878	0.0362276
0.309886	0.0328874	0.337868	0.03395	0.316164	0.0159572	-999	0	0.10738	0.0237436	0.365854	0.0325651			0.650151	0.0279296
0.0917926	0.00985063	0.0756571	0.00535363	0.070355	0.0157221	0.0979632	0.097467	0.000830797	0.00593213	0.0748937	0.00805389			0.0561051	0.0459616
0.0946854	0.0219427	0.117876	0.0195034	0.117117	0.03741	0.0977113	0.0475659	0.220845	0.0510417	0.0726133	0.0091654			0.0318596	0.010927
0.874336	0.0733086	0.962914	0.0918425	1.8917	0.397171	1.22551	0.334065	1.00594	0.136693	1.1199	0.0800115			0.0843085	0.0250038
-0.00284619	0.00826983	0.0534468	0.035677	0.0709904	0.0199386	0.1718	0.206675	0.11659	0.158888	0.0660836	0.0294355			0.0949914	0.0097262
0.445803	0.0299314	0.415656	0.0583869	0.397517	0.111303	0.400454	0.0885712	0.436332	0.150301	0.392646	0.0345501			0.340556	0.0562571
0.637151	0.0234968	0.612323	0.0699829	0.624333	0.0334731	0.491318	0.0552936	0.572993	0.187706	0.60374	0.068244			0.624528	0.144168
0.600381	0.0837225	0.757513	0.17148	0.313295	0.0522536	0.355805	0.0918796	0.46061	0.0242868	0.88251	0.141944			1.2103	0.158288
1.05241	0.0573695	0.911467	0.0486979	0.953237	0.0728953	0.763403	0.0937154	0.762951	0.260475	0.920551	0.0719898			1.17211	0.151693
1.05686	0.0439028	1.08306	0.131172	1.01422	0.0612637	0.86459	0.0422461	0.824075	0.186009	0.978166	0.0428907			0.811027	0.0575449
1.15016	0.0961555	0.766613	0.135294	1.17773	0.0590394	0.986395	0.109625	0.906377	0.205104	1.06912	0.146167			0.0593658	0.0618357
0.182431	0.0380971	0.308933	0.0765026	0.139275	0.0172388	0.109052	0.0573951	0.105738	0.0170881	0.109394	0.0381364			0.0324361	0.0232313
0.0456452	0.0140698	0.0390513	0.0172312	0.0388912	0.00807163	0.060293	0.0671228	0.035172	0.0205235	-0.0082894	0.00418082			-999	0
0.00153813	0.00835762	0.0182707	0.0163279	0.00493349	0.0342808	0.241226	0.355449	0.0199742	0.018442	0.0299133	0.0113664			-999	0
0.233859	0.0192886	0.194147	0.0332905	0.159793	0.0572672	0.396904	0.28056	0.165669	0.0976681	0.172288	0.0558936			-999	0
0.903736	0.0420794	0.916303	0.0276503	0.771639	0.106556	0.472075	0.355352	0.609223	0.210819	0.82903	0.0486238			-999	0
0.528749	0.0417873	1.28947	0.0598875	0.491395	0.0684247	0.515657	0.125361	0.495981	0.133605	1.21236	0.0574516
